# Supplementary material
Source: Springer Nature journal article supplement (https://www.springermedizin.de/resource/supplementary/13048_2012_97_MOESM5_ESM.pdf/9664888)

**A.**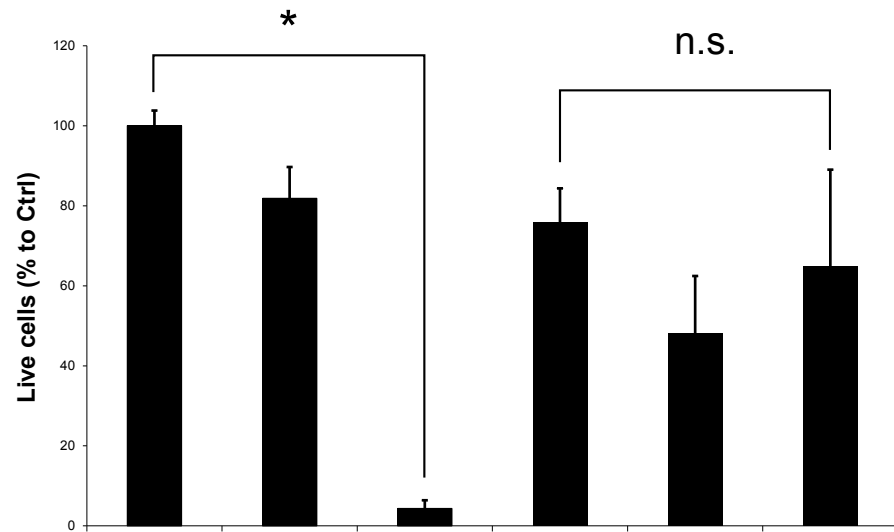

|           |   |   |   |   |   |   |
|-----------|---|---|---|---|---|---|
| Treatment | - | - | - | + | + | + |
| NAC       | - | - | - | + | + | + |
| Met       | - | + | - | - | + | - |
| PEITC     | - | - | + | - | - | + |

**B.**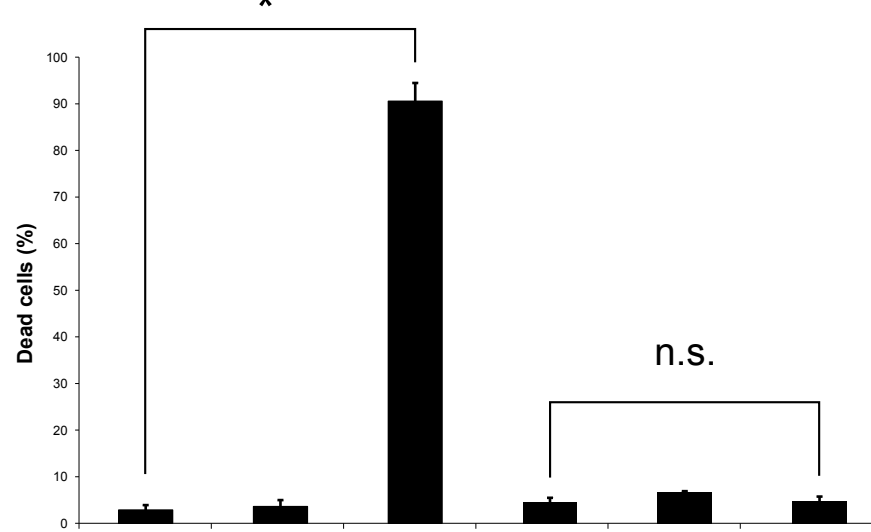

|           |   |   |   |   |   |   |
|-----------|---|---|---|---|---|---|
| Treatment | - | - | - | + | + | + |
| NAC       | - | - | - | + | + | + |
| Met       | - | + | - | - | + | - |
| PEITC     | - | - | + | - | - | + |

Supplement: MOESM5 [file 9664888]
